# Supplementary material for: Physical and optoelectronic features of lead-free A2AgRhBr6 (A = Cs, Rb, K, Na, Li) with halide double perovskite composition
Source: Royal Society of Chemistry journal article supplement (doi:10.1039/d0tc02501a), 2020-01-01
Supplement: d0tc02501a1.pdf [file d0tc02501a1.pdf]

## Physical and Optoelectronic Features of Lead-free $A_2AgRhBr_6$ ( $A = Cs, Rb, K, Na, Li$ ) with Halide Double Perovskite Composition

Pradeep R. Varadwaj,<sup>\*,a,b</sup> Helder M. Marques<sup>b</sup>

<sup>a</sup>Department of Chemical System Engineering, School of Engineering, The University of Tokyo  
7-3-1, Tokyo 113-8656, Japan

<sup>b</sup>Molecular Sciences Institute, School of Chemistry, University of the Witwatersrand,  
Johannesburg, 2050 South Africa.

Email: pradeep@t.okayama-u.ac.jp; prv.aist@gmail.com

### Supplementary Information

**Table S1:** (Spin-polarized) Cartesian coordinates of SCAN-*rVV10* relaxed  $Cs_2AgRhBr_3$  reduced primitive cell (10 atoms).

|     | x       | y       | z       |
|-----|---------|---------|---------|
| Cs1 | 0.25000 | 0.25000 | 0.25000 |
| Cs2 | 0.75000 | 0.75000 | 0.75000 |
| Ag1 | 0.50000 | 0.50000 | 0.50000 |
| Rh1 | 0.00000 | 0.00000 | 0.00000 |
| Br1 | 0.23603 | 0.23603 | 0.76397 |
| Br2 | 0.76256 | 0.76256 | 0.23744 |
| Br3 | 0.76256 | 0.23744 | 0.76256 |
| Br4 | 0.23744 | 0.76256 | 0.23744 |
| Br5 | 0.76256 | 0.23744 | 0.23744 |
| Br6 | 0.23744 | 0.76256 | 0.76256 |

**Table S2:** (Spin-polarized) Cartesian coordinates of SCAN-*rVV10* relaxed Cs<sub>2</sub>AgRhBr<sub>3</sub> conventional unit-cell (40 atoms).

|      | x       | y       | z       |
|------|---------|---------|---------|
| Cs1  | 0.75000 | 0.25000 | 0.75000 |
| Cs2  | 0.75000 | 0.75000 | 0.75000 |
| Cs3  | 0.25000 | 0.25000 | 0.75000 |
| Cs4  | 0.25000 | 0.75000 | 0.75000 |
| Cs5  | 0.25000 | 0.25000 | 0.25000 |
| Cs6  | 0.75000 | 0.75000 | 0.25000 |
| Cs7  | 0.75000 | 0.25000 | 0.25000 |
| Cs8  | 0.25000 | 0.75000 | 0.25000 |
| Ag1  | 0.50000 | 0.50000 | 0.50000 |
| Ag2  | 0.00000 | 0.00000 | 0.50000 |
| Ag3  | 0.00000 | 0.50000 | 0.00000 |
| Ag4  | 0.50000 | 0.00000 | 0.00000 |
| Rh1  | 0.50000 | 0.00000 | 0.50000 |
| Rh2  | 0.00000 | 0.50000 | 0.50000 |
| Rh3  | 0.50000 | 0.50000 | 0.00000 |
| Rh4  | 0.00000 | 0.00000 | 0.00000 |
| Br1  | 0.50000 | 0.00000 | 0.73741 |
| Br2  | 0.00000 | 0.50000 | 0.73741 |
| Br3  | 0.00000 | 0.00000 | 0.76259 |
| Br4  | 0.50000 | 0.50000 | 0.76259 |
| Br5  | 0.00000 | 0.26259 | 0.50000 |
| Br6  | 0.50000 | 0.76259 | 0.50000 |
| Br7  | 0.00000 | 0.73741 | 0.50000 |
| Br8  | 0.50000 | 0.23741 | 0.50000 |
| Br9  | 0.73741 | 0.00000 | 0.50000 |
| Br10 | 0.23741 | 0.50000 | 0.50000 |
| Br11 | 0.76259 | 0.50000 | 0.50000 |
| Br12 | 0.26259 | 0.00000 | 0.50000 |
| Br13 | 0.50000 | 0.50000 | 0.23741 |
| Br14 | 0.00000 | 0.00000 | 0.23741 |
| Br15 | 0.50000 | 0.00000 | 0.26259 |
| Br16 | 0.00000 | 0.50000 | 0.26259 |
| Br17 | 0.50000 | 0.73741 | 0.00000 |
| Br18 | 0.00000 | 0.76259 | 0.00000 |
| Br19 | 0.50000 | 0.26259 | 0.00000 |
| Br20 | 0.26259 | 0.50000 | 0.00000 |
| Br21 | 0.76259 | 0.00000 | 0.00000 |
| Br22 | 0.00000 | 0.23741 | 0.00000 |
| Br23 | 0.73741 | 0.50000 | 0.00000 |
| Br24 | 0.23741 | 0.00000 | 0.00000 |

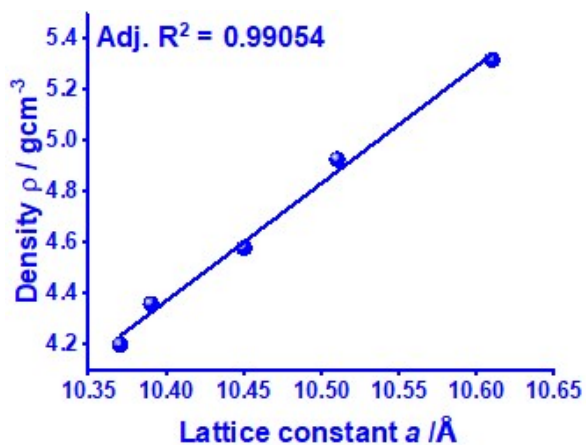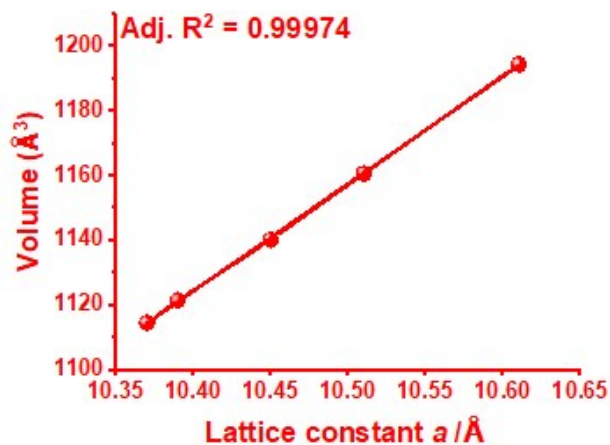

**Figure S1:** Dependence of a) density, and b) volume of the conventional unit-cell on the lattice constant  $a$  for  $A_2\text{AgRhBr}_6$  ( $A = \text{Cs, Rb, K, Na, Li}$ ). (See Table 1 for density, volume and lattice constants).

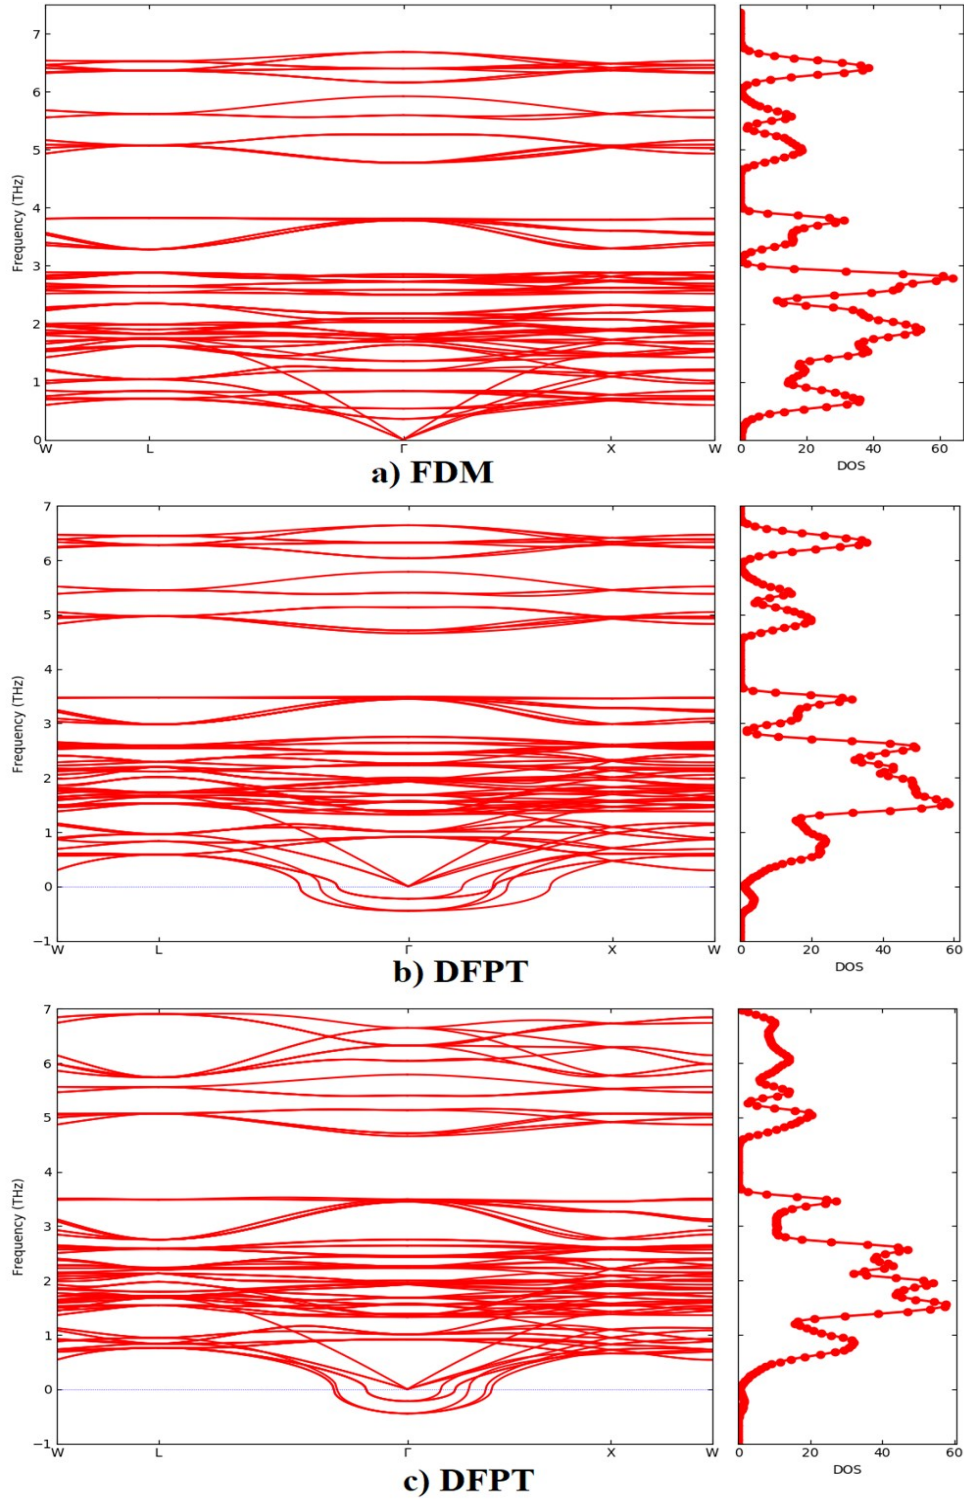

**Figure S2.** Comparison of the FDM level (harmonic) phonon dispersion, together with total phonon density of states of  $\text{Cs}_2\text{AgRhBr}_6$  with that of DFPT. a) Conventional unit-cell (40 atoms) with FDM; b) Conventional unit-cell (40 atoms) with DFPT; c)  $2\times 2\times 2$  supercell (320 atoms) built of the conventional unit-cell with DFPT.

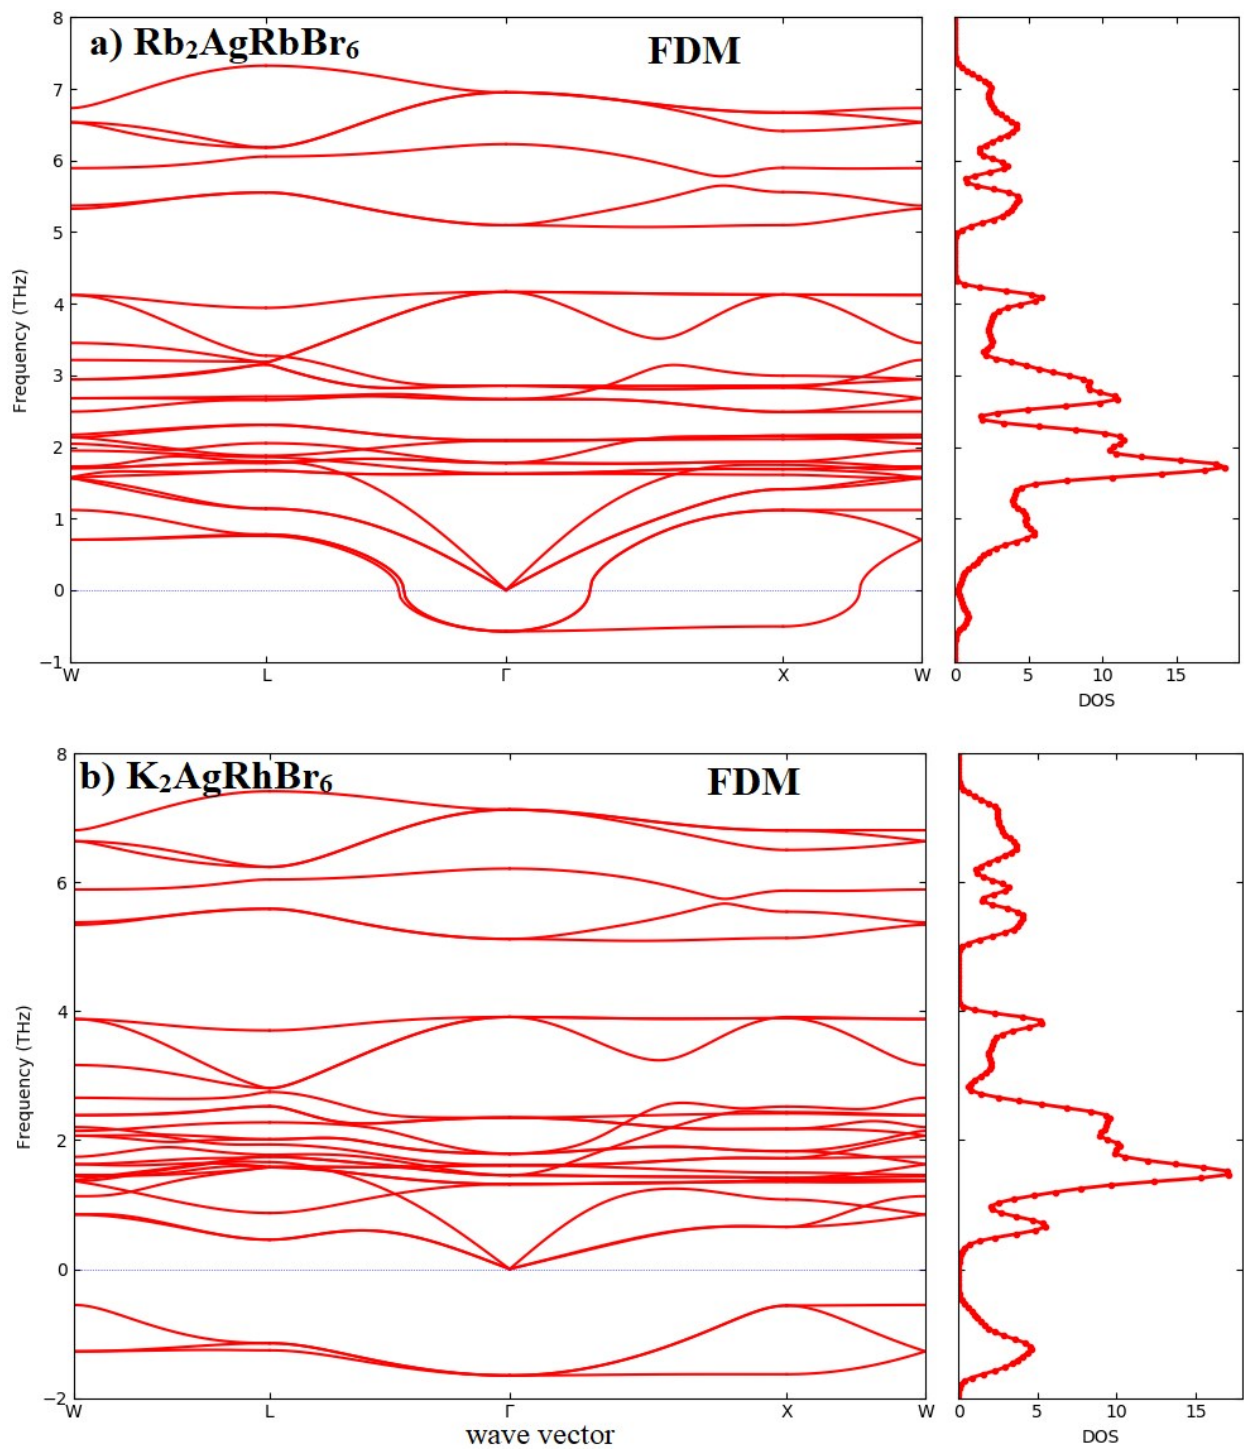

**Figure S3.** Comparison of the FDM (Finite Different Method) level (harmonic) phonon dispersion, together with total phonon density of states of  $\text{Rb}_2\text{AgRhBr}_6$  with that of  $\text{K}_2\text{AgRhBr}_6$ . The  $2 \times 2 \times 2$  supercells (80 atoms) of both the systems constructed using their corresponding relaxed primitive unit-cells were used.

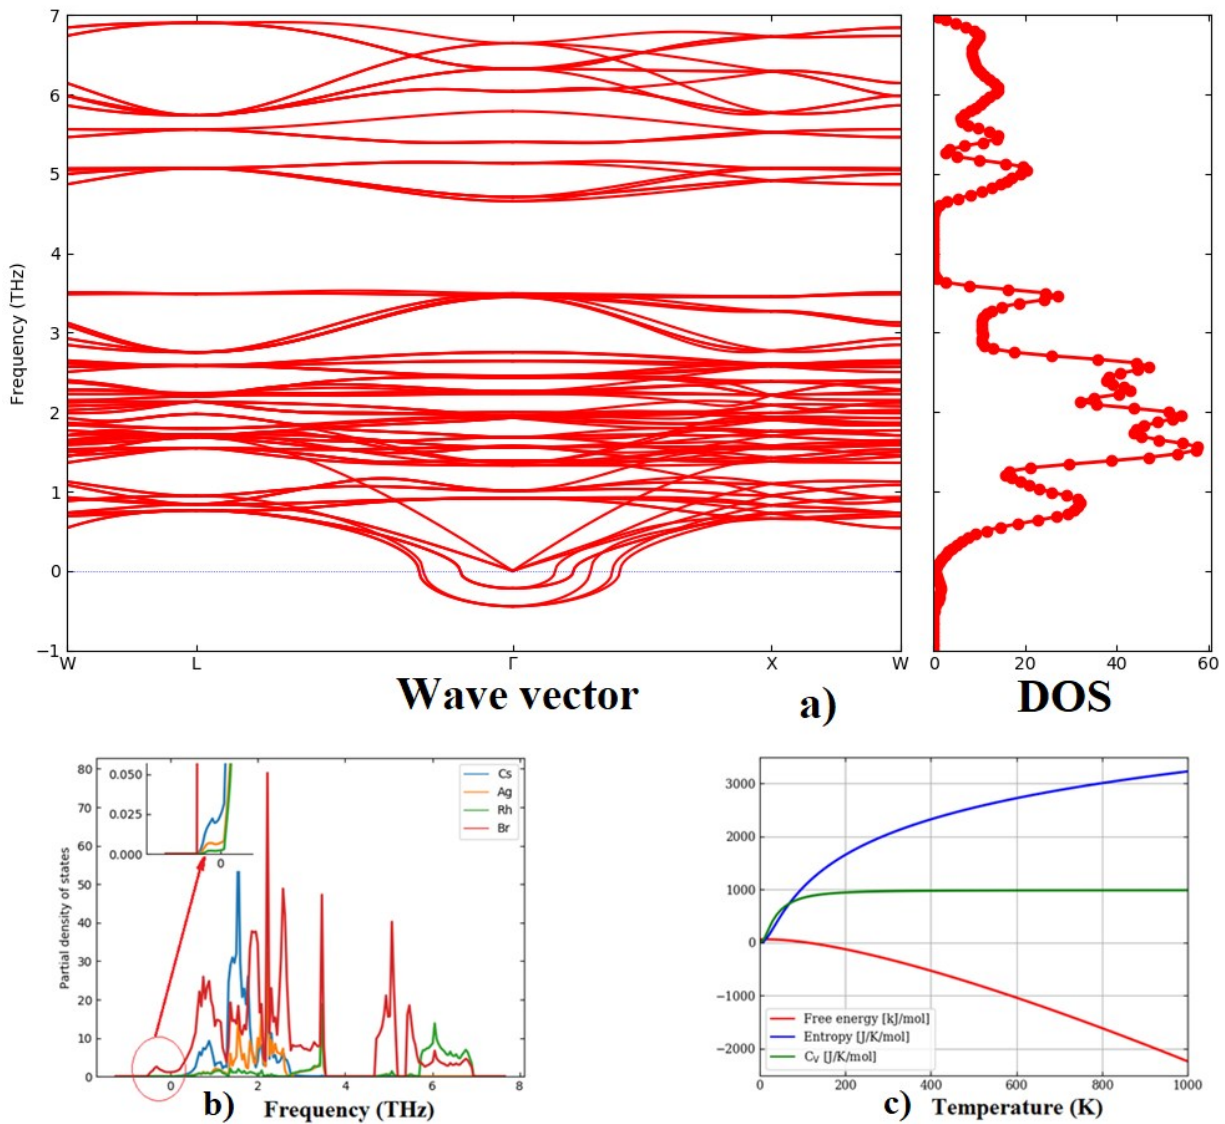

**Figure S4.** a) (DFPT) Harmonic level phonon dispersion, together with total phonon density of states, b) partial phonon density of states, and c) thermal properties of  $\text{Cs}_2\text{AgRhBr}_6$ . The insert in b) marked by an arrow in red refers to the frequency region below 0.0 THz. The  $2 \times 2 \times 2$  supercell (320 atoms) built of the conventional unit-cell was used. A similar result was obtained with the conventional unit-cell (40 atoms).

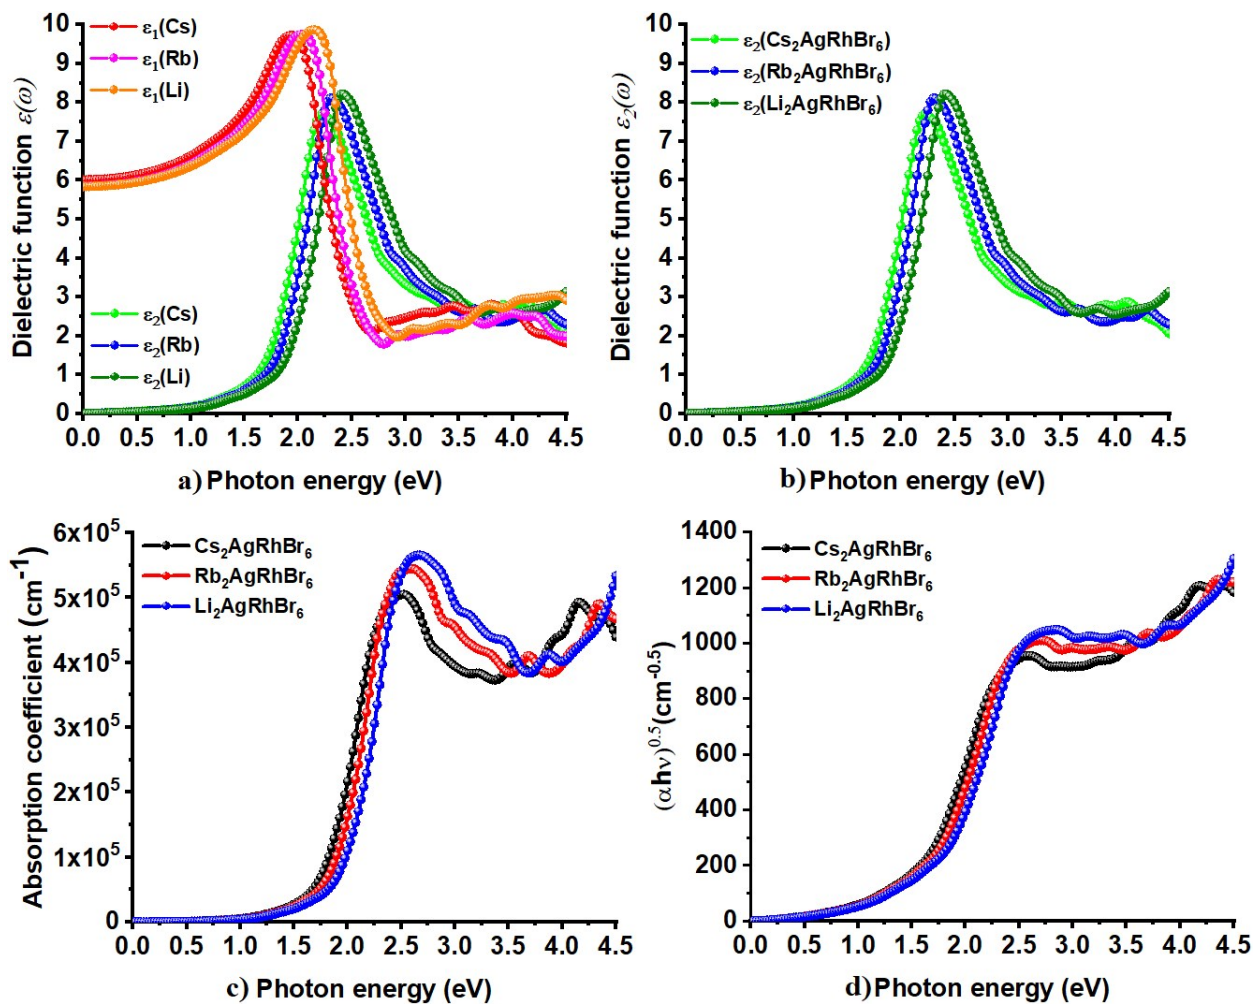

**Figure S5:** a) Dependence of SCAN-*rVV10* computed real and imaginary parts of the dielectric function on the photon energy for  $A_2AgRhBr_6$  ( $A = Cs, Rb, Li$ ). b) Dependence of the imaginary part of the dielectric function on the photon energy for the corresponding systems; the plot is the same as that shown in a), but is repeated in b) for clarity. c) Dependence of absorption coefficient on the photon energy for the corresponding systems. d) The Tauc plot for the corresponding systems.

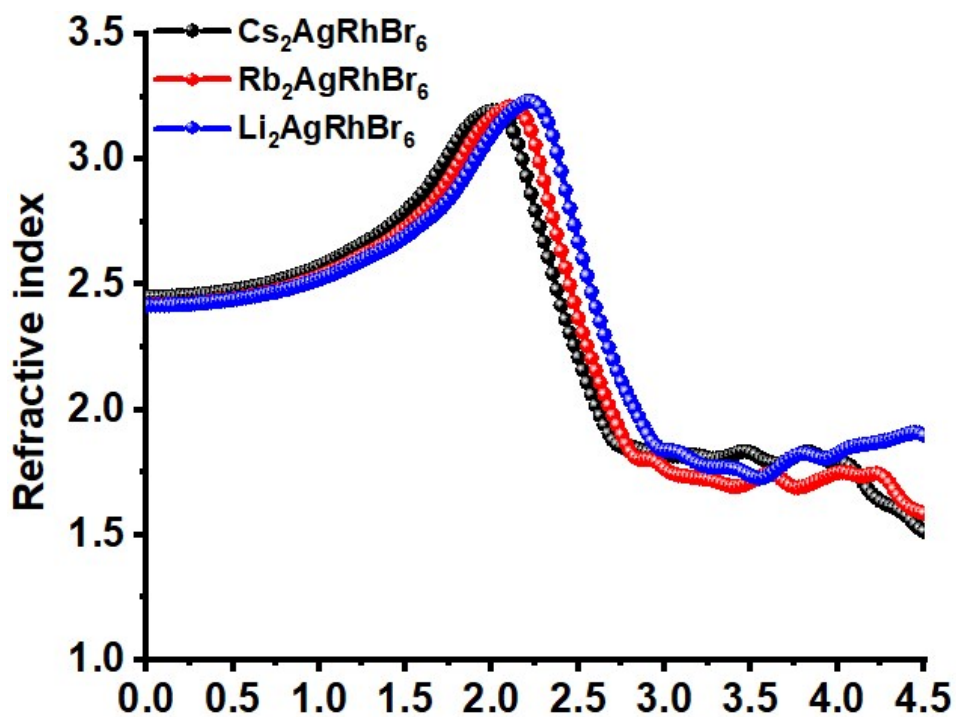

a) Photon energy (eV)

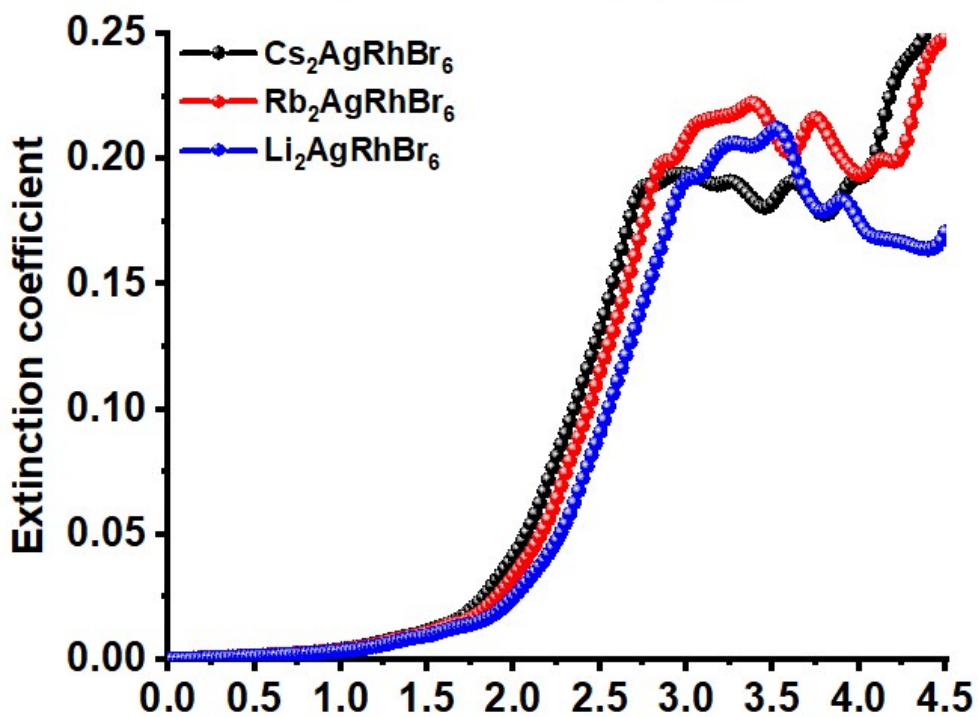

b) Photon energy (eV)

Figure S6: Dependence of SCAN- $rVV10$  computed a) real and b) imaginary parts of the refractive index on the photon energy for  $\text{A}_2\text{AgRhBr}_6$  ( $A = \text{Cs}, \text{Rb}, \text{Li}$ ).
